# Supplementary material for: Towards defining muscular regions of interest from axial magnetic resonance imaging with anatomical cross-reference: a scoping review of lateral hip musculature
Source: PubMed Central journal article supplement (PMC9166386; doi:10.1186/s12891-022-05439-x), 2022-06-04

**Additional file 3:** Preferred Reporting Items for Systematic reviews and Meta-Analyses extension for Scoping Reviews (PRISMA-ScR) (34) flow diagram.

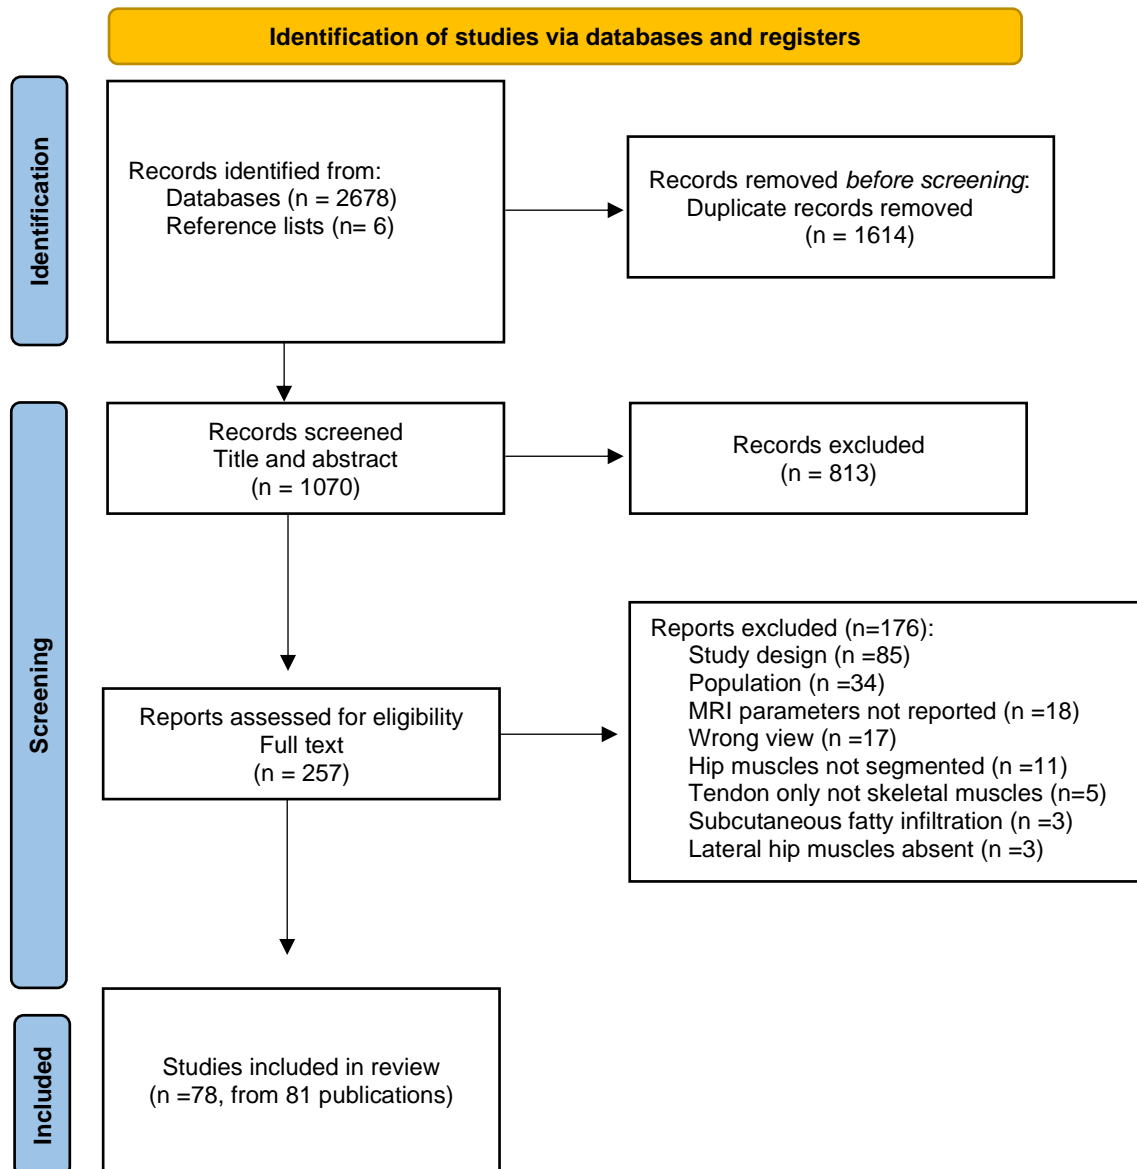

Supplement: 12891_2022_5439_MOESM3_ESM.pdf [file 12891_2022_5439_MOESM3_ESM.pdf]
